# Supplementary material for: Function of miR825 and miR825* as Negative Regulators in Bacillus cereus AR156-elicited Systemic Resistance to Botrytis cinerea in Arabidopsis thaliana
Source: PubMed Central journal article supplement (PMC6829492; doi:10.3390/ijms20205032), 2019-10-11
Supplement: ijms-20-05032-s001.pdf [file ijms-20-05032-s001.pdf]

## Supplementary materials:

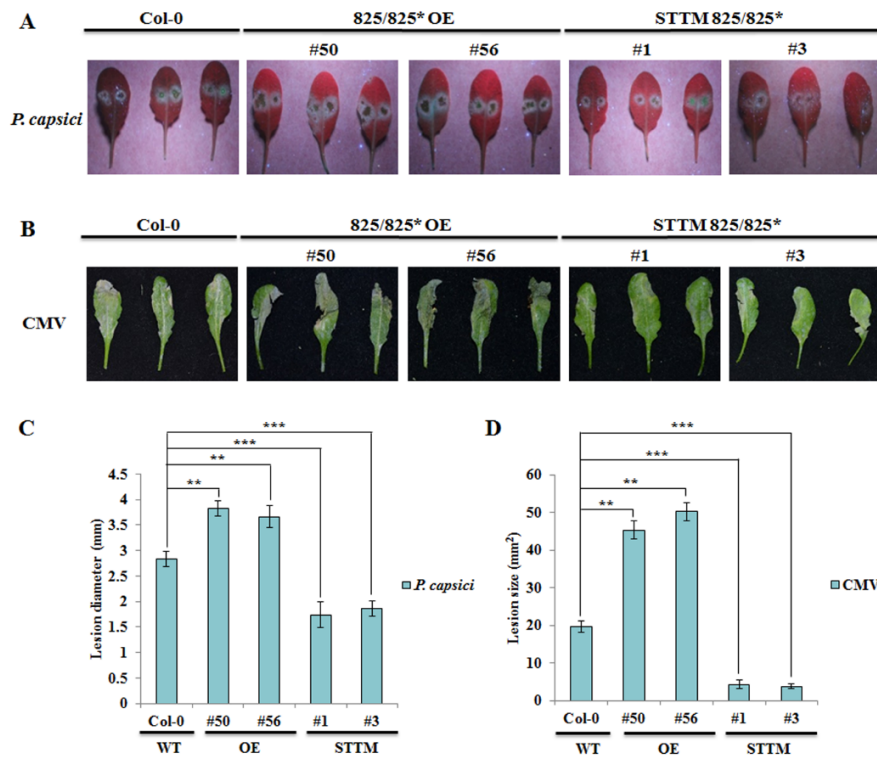

**Figure S1.** Plant resistance to *P. capsici* and CMV increased in STTM825/825\* lines, but decreased in miR825/825\* OE lines in comparison with that in Col-0. Three-week-old plants of *Arabidopsis* Col-0, miR825/825\* OE lines (#50 and #56), and STTM825/825\* lines (#1 and #3) were used for experiments. Approximately 100 *Phytophthora capsici* zoospores were inoculated onto the center of a leaf. Cucumber mosaic virus (CMV) was rub-inoculated onto *Arabidopsis* leaves. (A) Representative photographs of leaves and (D) sizes of leaf necrotic lesions of all tested plant lines inoculated with *P. capsici*, and the photos were taken at 36 hpi. (B) Symptoms and (C) sizes of lesions on leaves of each tested plant line inoculated with CMV at 7 dpi. Student's *t*-test was performed to compare the differences in plants with different genotypes. The data are presented as mean  $\pm$  SD from three biological replicates. The experiment was repeated three times with similar results obtained. \*\*  $P < 0.01$ ; \*\*\*  $P < 0.001$ .

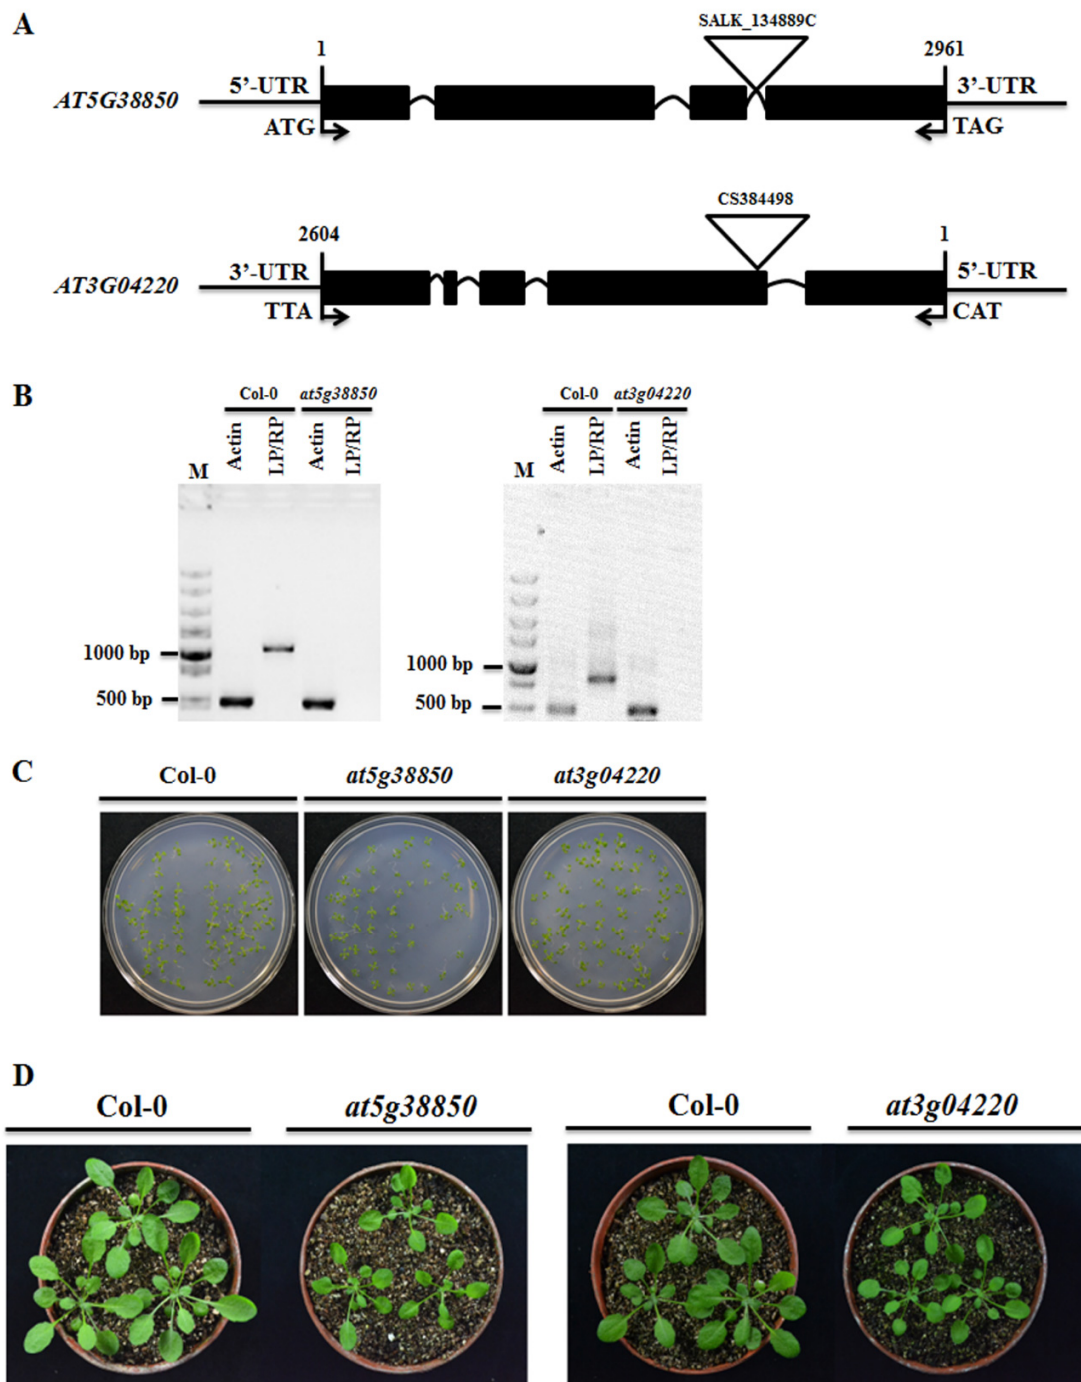

**Figure S2.** Analysis of miR825 and miR825\* target mutants. (A) Structure of the genes *at5g38850* (SALK\_134889C) and *at3g04220* (CS384498) with T-DNA insertion sites indicated. Black boxes: exons; curved lines: introns; lines: UTRs; triangles: T-DNA insertion sites. Nucleotide positions are indicated by numbers. (B) T-DNA insertions in *at5g38850* (SALK\_134889C) and *at3g04220* (CS384498) were confirmed by semi-quantitative RT-PCR, and left arm primer (LP) and right arm primer (RP) were utilized. *AtActin1* was used as the control, with *AtActin1-F* and *AtActin1-R* employed as primers. (C) Germination of 7-day-old *at5g38850* and *at3g04220* mutant seeds

compared with that of Col-0 plants. (D) Phenotypes of four-week-old plants of *at5g38850* and *at3g04220* mutants compared with Col-0 plants.

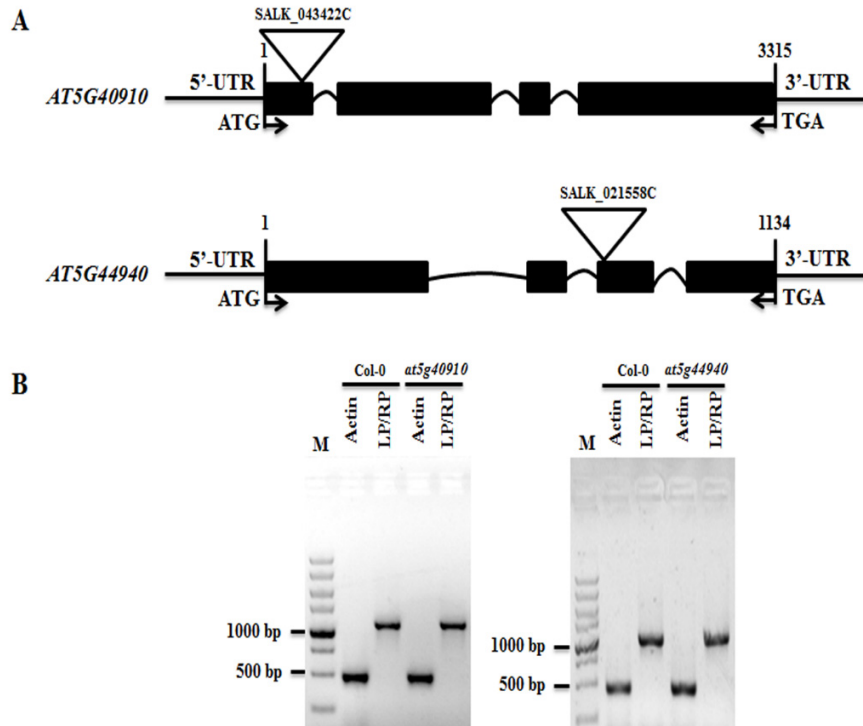

**Figure S3.** Analysis of *at5g40910* and *at5g44940* mutants. (A) Structure of the genes *at5g40910* (SALK\_043422C) and *at5g44940* (SALK\_021558C) with T-DNA insertion sites indicated. Black boxes: exons; curved lines: introns; lines: UTRs; triangles: T-DNA insertion sites. Nucleotide positions are indicated by numbers. (B) T-DNA insertions in *at5g40910* (SALK\_043422C) and *at5g44940* (SALK\_021558C) were confirmed by semi-quantitative RT-PCR, and left arm primer (LP) and right arm primer (RP) were utilized. *AtActin1* was used as the control, with *AtActin1-F* and *AtActin1-R* employed as primers.

**Table S1.** List of probes and primers used in the current research.

| Probes for small RNA gel blots  |                            |
|---------------------------------|----------------------------|
| Name                            | Sequence (5'-3')           |
| anti-miR825                     | GTTCATGCACCTTCTTGAGAA      |
| anti-miR825*                    | GCTTCTTCGAGCTGGTGCTTGA     |
| anti-U6                         | TGTATCGTTCCAATTTTATCGGATGT |
| Primers for quantitative RT-PCR |                            |
| Name                            | Sequence (5'-3')           |
| PR1-F                           | CTCGGAGCTACGCAGAACAA       |
| PR1-R                           | TTCTCGCTAACCCACATGTTCA     |
| PR2-F                           | CGGTACATCAACGTTGGAA        |
| PR2-R                           | GCGTAGTCTAGATGGATGTT       |
| PR5-F                           | ATGGCAAATATCTCCAGTATTCACA  |
| PR5-R                           | ATGTCGGGGCAAGCCGCTTGAGG    |
| PDF1.2-F                        | AGTTGTGCGAGAAGCCAAGT       |
| PDF1.2-R                        | GTTGCATGATCCATGTTTGG       |
| AtActin1-F                      | GGCGATGAAGCTCAATCCAAACG    |
| AtActin1-R                      | GGTCACGACCAGCAAGATCAAGACG  |

|                                         |                                              |
|-----------------------------------------|----------------------------------------------|
| BcActin-F                               | TCCAAGCGTGGTATCTTACCC                        |
| BcActin-R                               | TGGTGCTACACGAAGTTCGTTG                       |
| FRK1-F                                  | GCCAACGGAGACATTAGAG                          |
| FRK1-R                                  | CCATAACGACCTGACTCATC                         |
| WRKY53-F                                | CACCAGAGTCAAACCAGCCATTAC                     |
| WRKY53-R                                | CTTTACCATCATCAAGCCCATCGG                     |
| miR825* target BETA-TUB4-F              | GAGGGAGCCATTGACAACATCTT                      |
| miR825* target BETA-TUB4-R              | GCGAACAGTTCACAGCTATGTTCA                     |
| miR825* target AT5G40910-F              | TGTCTTGGCAAATGAAACAGGTACT                    |
| miR825* target AT5G40910-R              | AACCCCAATAAAAGTAACCTTAGACG                   |
| miR825* target AT5G38850-F              | TTCTCCCTTATTTTGTCTCGCATT                     |
| miR825* target AT5G38850-R              | TCTCCTTCACTGATTTACCTGTT                      |
| miR825* target AT3G04220-F              | CAAGGAAGAAATGGGTCAAACAGTG                    |
| miR825* target AT3G04220-R              | CCATCCCAATCAAATCGTCAAAATC                    |
| miR825 target AT5G44940-F               | GAGAAGCTCATCTCAGGATGTC                       |
| miR825 target AT5G44940-R               | CGAGTAACAGATGATCGTATGTCT                     |
| <b>Primers for plasmid construction</b> |                                              |
| <b>Name</b>                             | <b>Sequence (5'-3')</b>                      |
| AT5G40910-F                             | CGGGGTACCATGGCTTTTTTCATCACCGTCTG             |
| AT5G40910-R                             | CGCGTCGACTCATTGCATCTGAAGAAAGAAGCAAG          |
| AT5G38850-F                             | CGGGGTACCATGGCTTCTGCTCGAACTTG                |
| AT5G38850-R                             | CGCGTCGACCTATTTTCATATTCATTTCTCCTTTCCTGATTTT  |
| AT3G04220-F                             | CGGGGTACCATGGATTCTCTTTTTTACTCGAAACTG         |
| AT3G04220-R                             | CGCGTCGACTTAGCATTATATAAACTTCAATCTCTTGAGATAAG |
| AT5G44940-F                             | CGGGGTACCATGGAGGAGTTCGATTATATCAGTG           |
| AT5G44940-R                             | CGCGTCGACTCAATCGATGATAATTTGACATGTGG          |
| <b>Primers for target mutants</b>       |                                              |
| <b>Name</b>                             | <b>Sequence (5'-3')</b>                      |
| LBb1.3                                  | ATTTTGCCGATTTCGGAAC                          |
| at5g40910-LP                            | GAAGCTGACGCCTATGTATGC                        |
| at5g40910-RP                            | CTAAGCCGAAAACCGGTAGAG                        |
| at5g38850-LP                            | CAACATGTGGGTAGACAAGCC                        |
| at5g38850-RP                            | GGCAAGATACGCTCTCAAGTG                        |
| at3g04220-LP                            | CCAAGATCGCAATCATCTTGC                        |
| at3g04220-RP                            | CATAGTAGTCATCGGAACACG                        |
| at5g44940-LP                            | TCGATTAATGGAGTTGATCGG                        |
| at5g44940-RP                            | GACATGTGGGAGAAAAGCTTTG                       |
